# Supplementary material for: Combining Stage Specificity and Metabolomic Profiling to Advance Antimalarial Drug Discovery
Source: PubMed Central journal article supplement (PMC7031696; doi:10.1016/j.chembiol.2019.11.009), 2020-02-20
Supplement: mmc1.pdf [file mmc1.pdf]

**Cell Chemical Biology, Volume 27**

**Supplemental Information**

**Combining Stage Specificity and Metabolomic**

**Profiling to Advance Antimalarial Drug Discovery**

**James M. Murithi, Edward S. Owen, Eva S. Istvan, Marcus C.S. Lee, Sabine Otilie, Kelly Chibale, Daniel E. Goldberg, Elizabeth A. Winzeler, Manuel Llinás, David A. Fidock, and Manu Vanaerschot**

**Table S1 (related to Figures 1–6). Asexual blood stage-specific IC<sub>50</sub><sup>8h</sup> data in nM for the tested antimalarials.**

| Compound             | Early rings           |      |   | Late rings            |      |   | Early trophozoites    |      |   | Late trophozoites     |       |   | Schizonts             |       |   | Overall (72hr assay)  |      |   | Peak Activity      | Ratio lowest IC <sub>50</sub> <sup>8hr</sup> /IC <sub>50</sub> <sup>72hr</sup> |
|----------------------|-----------------------|------|---|-----------------------|------|---|-----------------------|------|---|-----------------------|-------|---|-----------------------|-------|---|-----------------------|------|---|--------------------|--------------------------------------------------------------------------------|
|                      | Mean IC <sub>50</sub> | SEM  | n | Mean IC <sub>50</sub> | SEM  | n | Mean IC <sub>50</sub> | SEM  | n | Mean IC <sub>50</sub> | SEM   | n | Mean IC <sub>50</sub> | SEM   | n | Mean IC <sub>50</sub> | SEM  | n |                    |                                                                                |
| Dihydroartemisinin   | 1.5                   | 0.1  | 3 | 2.4                   | 0.1  | 3 | 2.4                   | 0.4  | 3 | 3.9                   | 0.2   | 3 | 11.6                  | 1.3   | 3 | 1.0                   | 0.1  | 4 | Rings + Trophs     | 1.5                                                                            |
| Chloroquine          | 17.8                  | 5.5  | 4 | 18.6                  | 2.5  | 3 | 17.4                  | 3.5  | 3 | 30.1                  | 6.3   | 3 | 60.3                  | 13.4  | 3 | 5.9                   | 0.8  | 3 | Rings + Trophs     | 2.9                                                                            |
| Mefloquine           | 258                   | 106  | 3 | 147                   | 74   | 3 | 28.8                  | 7.0  | 3 | 29.5                  | 6.9   | 3 | 138                   | 39    | 3 | 9.8                   | 1.0  | 3 | Trophs             | 3.0                                                                            |
| Lumefantrine         | 15.4                  | 4.0  | 3 | 15.8                  | 3.5  | 3 | 19.54                 | 1.6  | 3 | 22.3                  | 2.0   | 3 | 81.0                  | 32.5  | 3 | 1.3                   | 0.0  | 3 | Rings + Trophs     | 11.6                                                                           |
| Piperaquine          | 26.2                  | 1.1  | 3 | 46.3                  | 13.1 | 3 | 27.4                  | 3.3  | 3 | 32.9                  | 1.1   | 3 | 67.0                  | 9.6   | 3 | 15.4                  | 2.3  | 4 | Rings + Trophs     | 1.7                                                                            |
| Ferroquine           | 4.9                   | 0.3  | 3 | 10.9                  | 1.7  | 3 | 23.2                  | 2.4  | 3 | 36.8                  | 3.3   | 3 | 49.3                  | 6.2   | 3 | 3.5                   | 0.4  | 4 | Rings              | 1.4                                                                            |
| Methylene blue       | 3.2                   | 0.3  | 3 | 13.3                  | 2.7  | 3 | 5.9                   | 0.4  | 3 | 8.3                   | 2.0   | 3 | 64.8                  | 17.8  | 3 | 1.8                   | 0.1  | 4 | Rings + Trophs     | 1.8                                                                            |
| KAI407 - shift 1     | -                     | -    | - | -                     | -    | - | -                     | -    | - | 161                   | 44.0  | 3 | -                     | -     | - | -                     | -    | - | -                  | 3.9                                                                            |
| KAI407 - shift 2     | 16263                 | 904  | 2 | 14021                 | 923  | 3 | 5139                  | 1727 | 3 | 13386                 | 354   | 2 | 46.2                  | 0.6   | 3 | 11.8                  | 1.0  | 3 | Schizonts          | -                                                                              |
| AN3661               | >1.25 μM              | -    | 3 | >1.25 μM              | -    | 3 | >1.25 μM              | -    | 3 | 138                   | 39    | 3 | 400                   | 34    | 3 | 35.6                  | 3.6  | 3 | Late Trophs        | 3.9                                                                            |
| KAE609               | >1.25 μM              | -    | 3 | >1.25 μM              | -    | 3 | 3.2                   | 0.6  | 3 | 1.1                   | 0.2   | 3 | 1.2                   | 0.1   | 3 | 0.73                  | 0.05 | 4 | Trophs + Schizonts | 1.5                                                                            |
| WLL-vs               | 23.7                  | 2.6  | 3 | 29.4                  | 4.4  | 3 | 57.6                  | 3.1  | 3 | 47.1                  | 3.1   | 3 | 50.1                  | 5.7   | 3 | 7.2                   | 0.8  | 3 | Rings              | 3.3                                                                            |
| DSM265 - shift 1     | -                     | -    | - | -                     | -    | - | 10.2                  | 2.2  | 3 | 7.7                   | 0.9   | 3 | 19.2                  | 2.3   | 3 | 3.8                   | 0.1  | 3 | Late Trophs        | 2.0                                                                            |
| DSM265 - shift 2     | 4821                  | 1605 | 3 | 1493                  | 308  | 3 | 1481                  | 240  | 3 | -                     | -     | - | >25 μM                | -     | - | -                     | -    | - | -                  | -                                                                              |
| Atovaquone - shift 1 | -                     | -    | - | -                     | -    | - | 0.68                  | 0.06 | 3 | 3.7                   | 0.2   | 3 | 7.4                   | 1.3   | 3 | 1.1                   | 0.1  | 3 | Late Trophs        | 3.3                                                                            |
| Atovaquone - shift 2 | 553                   | 228  | 3 | 324                   | 45   | 3 | 619                   | 132  | 3 | -                     | -     | 3 | >25 μM                | -     | 3 | -                     | -    | - | -                  | -                                                                              |
| Fosmidomycin         | >10 μM                | -    | 3 | >10 μM                | -    | 3 | 1983                  | 665  | 3 | 1993                  | 117   | 3 | >10 μM                | -     | 3 | 405                   | 8    | 3 | Trophs             | 4.9                                                                            |
| GNF-Pf-5660          | 119                   | 30   | 3 | 238                   | 57   | 3 | 108                   | 6    | 3 | 79.3                  | 10.8  | 3 | 290                   | 50    | 3 | 4.4                   | 0.2  | 3 | Rings + Trophs     | 18.0                                                                           |
| MMV665794            | 369                   | 101  | 3 | 590                   | 177  | 3 | 210                   | 20   | 3 | 165                   | 10    | 3 | 203                   | 8     | 3 | 91.3                  | 5.2  | 4 | Trophs + Schizonts | 1.8                                                                            |
| Naphthoquine         | 4.2                   | 1.8  | 3 | 8.1                   | 0.4  | 3 | 19.5                  | 2.9  | 3 | 29.2                  | 3.1   | 3 | 42.8                  | 8.4   | 3 | 3.2                   | 0.4  | 4 | Rings              | 1.3                                                                            |
| MMV000442            | >8 μM                 | -    | 3 | >8 μM                 | -    | 3 | 176                   | 11   | 3 | 197                   | 22    | 3 | 503                   | 48    | 3 | 37.2                  | 3.1  | 3 | Trophs             | 4.7                                                                            |
| MMV675939            | 1170                  | 277  | 3 | 268                   | 84   | 3 | 62.9                  | 29.9 | 3 | 146                   | 54    | 3 | 1647                  | 45    | 3 | 30.8                  | 4.4  | 5 | Trophs             | 2.0                                                                            |
| MMV085071            | 893                   | 78   | 3 | 492                   | 122  | 3 | 61.1                  | 0.1  | 3 | 81.4                  | 2.8   | 3 | 254                   | 47    | 3 | 105                   | 11   | 3 | Trophs             | 0.6                                                                            |
| MMV668311            | 140                   | 39   | 3 | 97.7                  | 4.3  | 3 | 68.9                  | 11.9 | 3 | 122                   | 26    | 3 | 382                   | 79    | 3 | 63.5                  | 1.7  | 3 | Rings + Trophs     | 1.1                                                                            |
| MMV020746            | >25 μM                | -    | 2 | >25 μM                | -    | 2 | 12587                 | 1681 | 2 | >25 μM                | -     | 2 | >25 μM                | -     | 2 | 56.8                  | 6.6  | 4 | All stages >10 μM  | 221.5                                                                          |
| MMV667491            | 2264                  | 349  | 3 | 1270                  | 92   | 3 | 521                   | 28   | 3 | 731                   | 50    | 3 | 842                   | 108   | 3 | 243                   | 35   | 4 | Trophs + Schizonts | 2.1                                                                            |
| MMV006455            | >12.5 μM              | -    | 3 | >12.5 μM              | -    | 3 | 441                   | 10   | 3 | 450                   | 46    | 3 | 933                   | 142   | 3 | 439                   | 46   | 4 | Trophs             | 1.0                                                                            |
| MMV022478            | 7628                  | 202  | 2 | 4870                  | 353  | 2 | 2132                  | 252  | 2 | 2529                  | 353   | 2 | 3370                  | 269   | 2 | 11.1                  | 0.8  | 3 | Trophs + Schizonts | 192.4                                                                          |
| MMV007181            | >25 μM                | -    | 3 | >25 μM                | -    | 3 | 253                   | 27   | 3 | 274                   | 16    | 3 | 570                   | 107   | 3 | 84.9                  | 8.9  | 3 | Trophs             | 3.0                                                                            |
| MMV665971            | >25 μM                | -    | 3 | >25 μM                | -    | 3 | 496                   | 51   | 3 | 485                   | 26    | 3 | 523                   | 29    | 3 | 185                   | 9    | 3 | Trophs + Schizonts | 2.6                                                                            |
| MMV665939            | 17011                 | 2420 | 3 | 22853                 | 5330 | 3 | 13476                 | 4752 | 3 | 39017                 | 13066 | 3 | 54384                 | 14265 | 3 | 478                   | 49   | 4 | All stages >10 μM  | 28.2                                                                           |
| MMV019017            | 8418                  | 1862 | 2 | 8663                  | 2298 | 3 | 1338                  | 133  | 3 | 1708                  | 116   | 3 | 3060                  | 229   | 3 | 306                   | 12   | 3 | Trophs + Schizonts | 4.4                                                                            |
| MMV000248            | n.d.                  | n.d. | 0 | 6744                  | -    | 1 | 411                   | -    | 1 | 376                   | -     | 1 | 754                   | -     | 1 | 103                   | 14   | 4 | Trophs             | 3.7                                                                            |
| MMV021735            | >25 μM                | -    | 3 | >25 μM                | -    | 3 | 5422                  | 1392 | 3 | 234                   | 12    | 3 | 5281                  | 622   | 3 | 232                   | 11   | 4 | Late Trophs        | 1.0                                                                            |
| MMV022224            | 838                   | 123  | 3 | 845                   | 152  | 3 | 542                   | 39   | 3 | 752                   | 58    | 3 | 2486                  | 472   | 3 | 199                   | 31   | 5 | Rings + Trophs     | 2.7                                                                            |
| MMV027496            | 2760                  | 529  | 3 | 878                   | 130  | 3 | 168                   | 26   | 3 | 199                   | 9     | 3 | 4339                  | 545   | 3 | 89.7                  | 7.9  | 3 | Trophs             | 1.9                                                                            |
| MMV019555            | 755                   | 159  | 3 | 788                   | 221  | 3 | 81.4                  | 1.6  | 3 | 110                   | 20    | 3 | 349                   | 66    | 3 | 33.3                  | 1.8  | 3 | Trophs             | 2.4                                                                            |
| MMV030666            | 10264                 | 3053 | 3 | 11440                 | 861  | 3 | 5124                  | 506  | 3 | 858                   | 29    | 3 | 4191                  | 307   | 3 | 462                   | 18   | 4 | Late Trophs        | 1.9                                                                            |
| MMV000787            | 5737                  | 1215 | 3 | 7870                  | 731  | 3 | 3312                  | 629  | 3 | 1354                  | 57    | 3 | 5912                  | 617   | 3 | 1960                  | 83   | 3 | Late Trophs        | 0.7                                                                            |

Shift 1 and shift 2 indicate the two half-maximal inhibitory concentrations for biphasic dose response curves. SEM: standard error of the mean; n: number of biological repeats; -: no data; IC<sub>50</sub><sup>8h</sup>: IC<sub>50</sub> based on 8-h exposure; IC<sub>50</sub><sup>72h</sup>: IC<sub>50</sub> based on 72-h exposure.

**Table S2 (related to Figures 1–6). SMILES and suspected mode of action (if known) of the tested antimalarials.**

| Compound                 | SMILES                                                                                                      | Suspected mode of action  | Origin candidate antimalarials | Alternative name |
|--------------------------|-------------------------------------------------------------------------------------------------------------|---------------------------|--------------------------------|------------------|
| Dihydroartemisinin (DHA) | <chem>C[C@@H]1CC[C@H]2[C@@H]([C@@H](O[C@H]3[C@@@]24[C@H]1CCC(O3)(OO4)C)O)C</chem>                           | -                         | -                              | -                |
| Chloroquine (CQ)         | <chem>CCN(CC)CCCC(NC1=C2C=CC(=CC2=NC1)Cl</chem>                                                             | β-hematin <sup>a</sup>    | -                              | -                |
| Mefloquine (MFQ)         | <chem>c1cc2c(cc(nc2c1)C(F)(F)C(F)(F)F)[C@@H]([C@H]3CCCCN3)O</chem>                                          | -                         | -                              | -                |
| Lumefantrine (LMF)       | <chem>CCCCN(CCCC)CC(C1=C2C3=C(C=C(C3)Cl)C(=CC4=CC=C(C4)Cl)C2=CC(=C1)Cl)O</chem>                             | -                         | -                              | -                |
| Piperaquine (PPQ)        | <chem>c1cc2c(ccnc2cc1Cl)N3CCN(CC3)CCCN4CCN(CC4)c5cncnc6c5ccc(c6)Cl</chem>                                   | β-hematin <sup>b</sup>    | -                              | -                |
| Ferroquine (FQ)          | <chem>CN(C)CC1=C(C=C1)CNC2=C3C=CC(=CC3=NC2)Cl.C1C=CC=[C-]1.[Fe+2]</chem>                                    | β-hematin <sup>c,d</sup>  | -                              | -                |
| Methylene blue (MB)      | <chem>CN(C)C1=CC2=C(C=C1)N=C3C=CC(=[N+](C)C)C=C3S2.[Cl-]</chem>                                             | β-hematin <sup>e</sup>    | -                              | -                |
| KAI407                   | <chem>O=C(N(C)C1=CC=C(C=C1)C#N)C2=CN3C(C=N2)=NC=C3C4=CC=C(C=C4)C(F)(F)F</chem>                              | PI4K <sup>f</sup>         | -                              | -                |
| AN3661                   | <chem>OB1C2=C(CCC(O)=O)C=CC=C2CO1</chem>                                                                    | CPSF <sup>g</sup>         | -                              | -                |
| KAE609                   | <chem>C1C=C(F)C=C2C(NC3=C2C[C@H](C)N[C@@]34C(CC5=C4C=C(C)C=C5)=O)=C1</chem>                                 | ATP4 <sup>h</sup>         | -                              | -                |
| WLL-vs                   | <chem>CC(C)[C@H]([C@@H](C=C/S(=O)(=O)C)N(C)=O)[C@H](CC(C)C)N(C=O)[C@H](CC1=CC=C(C=C1)N(C=O)CN3CCOCC3</chem> | Proteasome <sup>i,j</sup> | -                              | -                |
| DSM265                   | <chem>FS(F)(F)(F)C1=CC=C(NC2=CC(C)=NC3=NC(C(F)(F)F)C)=NN23)C=C1F</chem>                                     | DHODH <sup>k</sup>        | -                              | -                |
| Atovaquone (ATQ)         | <chem>O=C1C([C@H]2CC[C@H]3(C=C=C(C)C=C3)CC2)=C(O)C(C4=CC=CC=C41)=O</chem>                                   | CYTb <sup>l</sup>         | -                              | -                |
| Fosmidomycin             | <chem>C(CN(C=O)O)CP(=O)(O)O</chem>                                                                          | DXR <sup>m</sup>          | -                              | -                |
| GNF-Pf-5660              | <chem>CCOC(=O)C1=C(C)NC2=C(C1C3=CC=CC=C3)C(=O)CC(C2)C4=CC=C(C)C(OC)C=C4</chem>                              | * <sup>n</sup>            | -                              | -                |
| Naphthoquine (NQ)        | <chem>CC(C)[C@H]Nc1cc2c(c1O)CCCC2)Nc3cnc4c3ccc(c4)Cl</chem>                                                 | -                         | -                              | MMV000017        |
| MMV665794                | <chem>FC(F)(F)C1=CC(NC2=C(NC3=CC(=CC3)C(F)(F)F)N=C3C=CC=CC3=N2)=CC=C1</chem>                                | -                         | MMV Malaria Box                | -                |
| MMV000442                | <chem>CC(C)[C]c1ccc2OCN(Cc3ccc(Cl)cc3)Cc2c1</chem>                                                          | -                         | MMV Malaria Box                | -                |
| MMV675939                | <chem>FC(F)(F)C1=CC=C(NC2=CC(NC(C3=CC(C(F)(F)F)=CC3)=N4)=C4C=N2)N=C1</chem>                                 | -                         | Literature <sup>o</sup>        | -                |
| MMV085071                | <chem>COc1cncc(c1)-c1cncc(n1)N1CCN(CC1)c1cnccc1</chem>                                                      | -                         | MMV Pathogen Box               | -                |
| MMV668311                | <chem>CNc1nc(NCCCN(C)C)c2sc(cc2n1)c3cccc(c3)C(F)(F)F</chem>                                                 | -                         | Literature <sup>p</sup>        | -                |
| MMV020746                | <chem>Cc1ccc(Oc2ncccc2C(=O)Nc2cccc3ccccc23)C(C)c1</chem>                                                    | -                         | Literature <sup>p</sup>        | TCMDC-125499     |
| MMV667491                | <chem>CN(C)CCCN1cnc2c(c1=N)C(c3ccc4cccc4c3O2)c5cccc(c5)OC</chem>                                            | -                         | MMV Malaria Box                | -                |
| MMV006455                | <chem>CCCN(CCC)CC(O)COC1=C(C=CC=C1)C(=O)NC1=CC=CC=C1</chem>                                                 | -                         | MMV Malaria Box                | -                |
| MMV022478                | <chem>Clc1cccc(c1)-c1enn2ccc(nc12)C(=O)Nc1ccc(cc1)N1CCNCC1.OC(C(F)(F)F)=O</chem>                            | -                         | MMV Pathogen Box               | -                |
| MMV007181                | <chem>CC1=C2C=CC(O)=CC2=NC(NC2=CC=C(OCC3=CC=CC=C3)C=C2)=C1</chem>                                           | -                         | MMV Malaria Box                | -                |
| MMV665971                | <chem>CCOC(=O)C1=C(C)N=C2s)c(=C/c3cc(Cl)ccc3O)c(=O)n2C1c1ccc(OC)cc1</chem>                                  | -                         | MMV Malaria Box                | -                |
| MMV665939                | <chem>FC1=CC=C(C=C1)C(=O)NC1=C(SC=C1)C(=O)NC1CCCCC1</chem>                                                  | -                         | MMV Malaria Box                | -                |
| MMV019017                | <chem>COCCNCC(O)CN1C2=CC=C(C)C=C2C2=C1C=CC(C)C=C2</chem>                                                    | -                         | MMV Malaria Box                | -                |
| MMV000248                | <chem>Cl.CCN(C)CCN1c2cccc2n(CC(O)c2ccc(Cl)c(Cl)c2)c1=CN</chem>                                              | -                         | MMV Malaria Box                | -                |
| MMV021735                | <chem>CCCCCCCN(C1=CC=C(OC(C)C)C(=O)OCC)C=C1)C(=O)NC1=CC=C(C)C=C1OCC</chem>                                  | -                         | Literature <sup>p</sup>        | TCMDC-131919     |
| MMV022224                | <chem>[O-]C(=O)C(F)(F)F.CN(C)CC1=CC=C(C=C1)C1=CC2=C(N)N=CC=C2C1=CC=C(CN(C)C)C=C1</chem>                     | -                         | Literature <sup>p</sup>        | TCMDC-132409     |
| MMV027496                | <chem>COC1=C(OCCN(C)C)C=CC(=C1)C1=NC(=C(N1)C1=CC=CC=C1)C1=CC=CC=C1</chem>                                   | -                         | Literature <sup>p</sup>        | TCMDC-137716     |
| MMV019555                | <chem>Cl.C(CCCNc1c2CCCCc2nc2cccc12)CCNc1c2CCCCc2nc2cccc12</chem>                                            | -                         | MMV Malaria Box                | TCMDC-124183     |
| MMV030666                | <chem>CC(C)[C]OC(=O)N1CCN(CC1)C1=CC=CC=C1NC(=O)C1=C(OC2=CC=C(F)C=C2)C(=CC=C1)C(F)(F)F</chem>                | -                         | Literature <sup>p</sup>        | TCMDC-140951     |
| MMV000787                | <chem>CCCCOCC1=C2C=CC=NC2(=O)C(CN2CCN(CC2)C2=CC(C)C=C2)=C1</chem>                                           | -                         | MMV Malaria Box                | -                |

PI4K: Phosphatidylinositol-4-OH kinase, CPSF: Cleavage and polyadenylation specificity factor, ATP4: P-type cation translocating ATPase, DHODH: Dihydroorotate dehydrogenase, CYTB: Cytochrome b, DXR: 1-deoxy-D-xylulose-5-phosphate reductoisomerase; SMILES: simplified molecular line entry system.

<sup>a</sup>Slater, A.F., and Cerami, A. (1992). Inhibition by chloroquine of a novel haem polymerase enzyme activity in malaria trophozoites. *Nature* 355, 167-169.

<sup>b</sup>Raynes, K., Foley, M., Tilley, L., and Deady, L.W. (1996). Novel bisquinoline antimalarials. Synthesis, antimalarial activity, and inhibition of haem polymerisation. *Biochemical Pharmacology* 52, 551-559.

<sup>c</sup>Biot, C., Taramelli, D., Forfar-Bares, I., Maciejewski, L.A., Boyce, M., Nowogrocki, G., Brocard, J.S., Basilico, N., Olliaro, P., and Egan, T.J. (2005). Insights into the mechanism of action of ferroquine. Relationship between physicochemical properties and antiparasitodal activity. *Molecular Pharmacology* 2, 185-193.

<sup>d</sup>Dubar, F., Egan, T.J., Pradines, B., Kuter, D., Nkokazi, K.K., Forge, D., Paul, J.F., Pierrot, C., Kalamou, H., Khalife, J., et al. (2011). The antimalarial ferroquine: role of the metal and intramolecular hydrogen bond in activity and resistance. *ACS Chemical Biology* 6, 275-287.

<sup>e</sup>Atamna, H., Krugliak, M., Shalmiev, G., Deharo, E., Pescarmona, G., and Ginsburg, H. (1996). Mode of antimalarial effect of methylene blue and some of its analogues on *Plasmodium falciparum* in culture and their inhibition of *P. vinckei petteri* and *P. yoelii nigeriensis* in vivo. *Biochemical Pharmacology* 51, 693-700.

<sup>f</sup>McNamara, C.W., Lee, M.C., Lim, C.S., Lim, S.H., Roland, J., Simon, O., Yeung, B.K., Chatterjee, A.K., McCormack, S.L., Manary, M.J., et al. (2013). Targeting *Plasmodium* PI(4)K to eliminate malaria. *Nature* 504, 248-253.

<sup>g</sup>Sonoiki, E., Ng, C.L., Lee, M.C., Guo, D., Zhang, Y.K., Zhou, Y., Alley, M.R., Ah Yong, V., Sanz, L.M., Lafuente-Monasterio, M.J., et al. (2017). A potent antimalarial benzoxaborole targets a *Plasmodium falciparum* cleavage and polyadenylation specificity factor homologue. *Nature Communications* 8, 14574.

<sup>h</sup>Spillman, N.J., Allen, R.J., McNamara, C.W., Yeung, B.K., Winzeler, E.A., Diagona, T.T., and Kirk, K. (2013). Na<sup>+</sup> regulation in the malaria parasite *Plasmodium falciparum* involves the cation ATPase PfATP4 and is a target of the spiroindolone antimalarials. *Cell Host Microbe* 13, 227-237.

<sup>i</sup>Stokes, B.H., Yoo, E., Murithi, J.M., Luth, M.R., Afanasyev, P., da Fonseca, P.C.A., Winzeler, E.A., Ng, C.L., Bogoy, M., and Fidock, D.A. (2019). Covalent *Plasmodium falciparum*-selective proteasome inhibitors exhibit a low propensity for generating resistance in vitro and synergize with multiple antimalarial agents. *PLoS Pathog.* 15, e1007722.

<sup>j</sup>Li, H., O'Donoghue, A.J., van der Linden, W.A., Xie, S.C., Yoo, E., Foe, I.T., Tilley, L., Craik, C.S., da Fonseca, P.C., and Bogoy, M. (2016). Structure- and function-based design of *Plasmodium*-selective proteasome inhibitors. *Nature* 530, 233-236.

<sup>k</sup>Coteron, J.M., Marco, M., Esquivias, J., Deng, X., White, K.L., White, J., Koltun, M., El Mazouni, F., Kokkonda, S., Katneni, K., et al. (2011). Structure-guided lead optimization of triazolopyrimidine-ring substituents identifies potent *Plasmodium falciparum* dihydroorotate dehydrogenase inhibitors with clinical candidate potential. *Journal of Medicinal Chemistry* 54, 5540-5561.

<sup>l</sup>Fry, M., and Pudney, M. (1992). Site of action of the antimalarial hydroxynaphthoquinone, 2-[trans-4-(4'-chlorophenyl) cyclohexyl]-3-hydroxy-1,4-naphthoquinone (566C80). *Biochemical Pharmacology* 43, 1545-1553.

<sup>m</sup>Armstrong, C.M., Meyers, D.J., Imlay, L.S., Freil Meyers, C., and Odum, A.R. (2015). Resistance to the antimicrobial agent fosmidomycin and an FR900098 prodrug through mutations in the deoxyxylulose phosphate reductoisomerase gene (*dxr*). *Antimicrobial Agents and Chemotherapy* 59, 5511-5519.

<sup>n</sup>Vanaerschot, M., Lucantoni, L., Li, T., Combrinck, J.M., Ruecker, A., Kumar, T.R.S., Rubiano, K., Ferreira, P.E., Siciliano, G., Gulati, S., et al. (2017). Hexahydroquinolines are antimalarial candidates with potent blood-stage and transmission-blocking activity. *Nature Microbiology* 2, 1403-1414.

<sup>o</sup>Nchinda, A.T., Le Manach, C., Paquet, T., Gonzalez Cabrera, D., Wicht, K.J., Brunschwig C., Njoroge, M., Abay, E., Taylor, D., Lawrence, N., et al. (2018). Identification of fast-acting 2,6-disubstituted imidazopyridines that are efficacious in the in vivo humanized *Plasmodium falciparum* NO<sub>2</sub>scidl2Ry<sup>mut</sup> mouse model of Malaria. *Journal of Medicinal Chemistry* 61, 4213-4227.

<sup>p</sup>Corey, V.C., Lukens, A.K., Istvan, E.S., Lee, M.C.S., Franco, V., Magistrado, P., Coburn-Flynn, O., Sakata-Kato, T., Gnading, N., et al. (2016). A broad analysis of resistance development in the malaria parasite. *Nature Communications* 15, 11901.

**Table S3 (related to Figure 4). Assessment of compound solubility by UV/vis spectroscopy.**

| Compound         | Wavelength |       |       |       |       |       | Ratio<br>fil./std. | Solubility            |
|------------------|------------|-------|-------|-------|-------|-------|--------------------|-----------------------|
|                  | 280        | 300   | 320   | 340   | 360   | 800   |                    |                       |
| Absorbance (AU)  |            |       |       |       |       |       |                    |                       |
| DHA fil.         | 2.351      | 0.462 | 0.250 | 0.179 | 0.124 | 0.041 | 1.02               | ≥ 500 μM              |
| DHA std.         | 2.314      | 0.456 | 0.244 | 0.173 | 0.120 | 0.042 |                    |                       |
| Chloroquine fil. | 2.637      | 1.170 | 2.155 | 2.075 | 0.203 | 0.042 | 0.91               | ≥ 100 μM and ≤ 500 μM |
| Chloroquine std. | 2.747      | 1.331 | 2.562 | 2.178 | 0.204 | 0.041 |                    |                       |
| Piperaquine fil. | 2.322      | 0.473 | 0.269 | 0.189 | 0.129 | 0.041 | 0.69               | ≥ 100 μM and ≤ 500 μM |
| Piperaquine std. | 2.694      | 0.822 | 0.646 | 0.555 | 0.462 | 0.304 |                    |                       |
| MMV007181 fil.   | 2.346      | 0.470 | 0.259 | 0.194 | 0.139 | 0.042 | 0.69               | ≥ 100 μM and ≤ 500 μM |
| MMV007181 std.   | 2.677      | 0.754 | 0.534 | 0.551 | 0.508 | 0.131 |                    |                       |
| MMV000442 fil.   | 2.517      | 0.606 | 0.380 | 0.310 | 0.248 | 0.086 | 0.74               | ≥ 100 μM and ≤ 500 μM |
| MMV000442 std.   | 2.754      | 0.898 | 0.711 | 0.660 | 0.619 | 0.274 |                    |                       |
| MMV006455 fil.   | 2.810      | 0.904 | 0.336 | 0.186 | 0.130 | 0.041 | 1.00               | ≥ 500 μM              |
| MMV006455 std.   | 2.826      | 0.928 | 0.329 | 0.175 | 0.120 | 0.041 |                    |                       |

Fil.: filtered; std: standard.

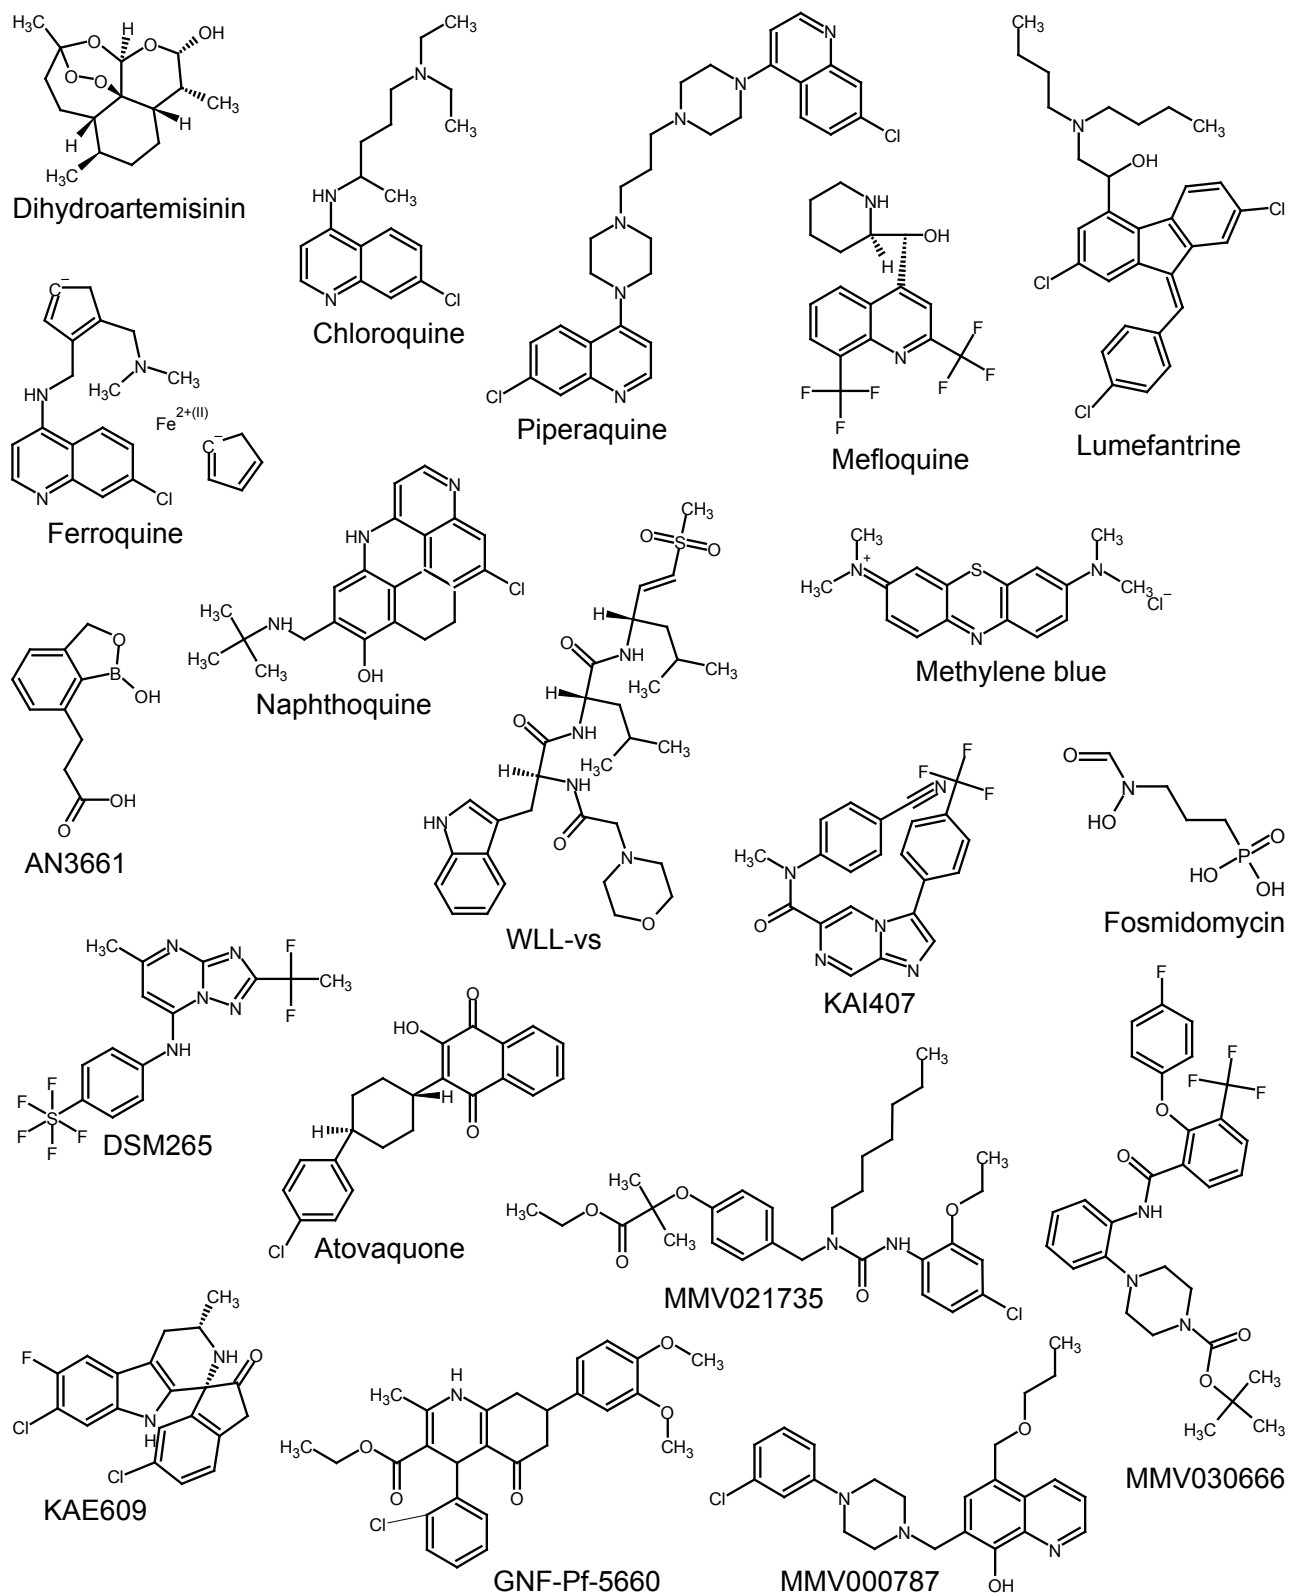

**Figure S1 (related to Figures 1–6). Structures of the tested antimalarials, part 1. References on mode of action can be found in Table S2.**

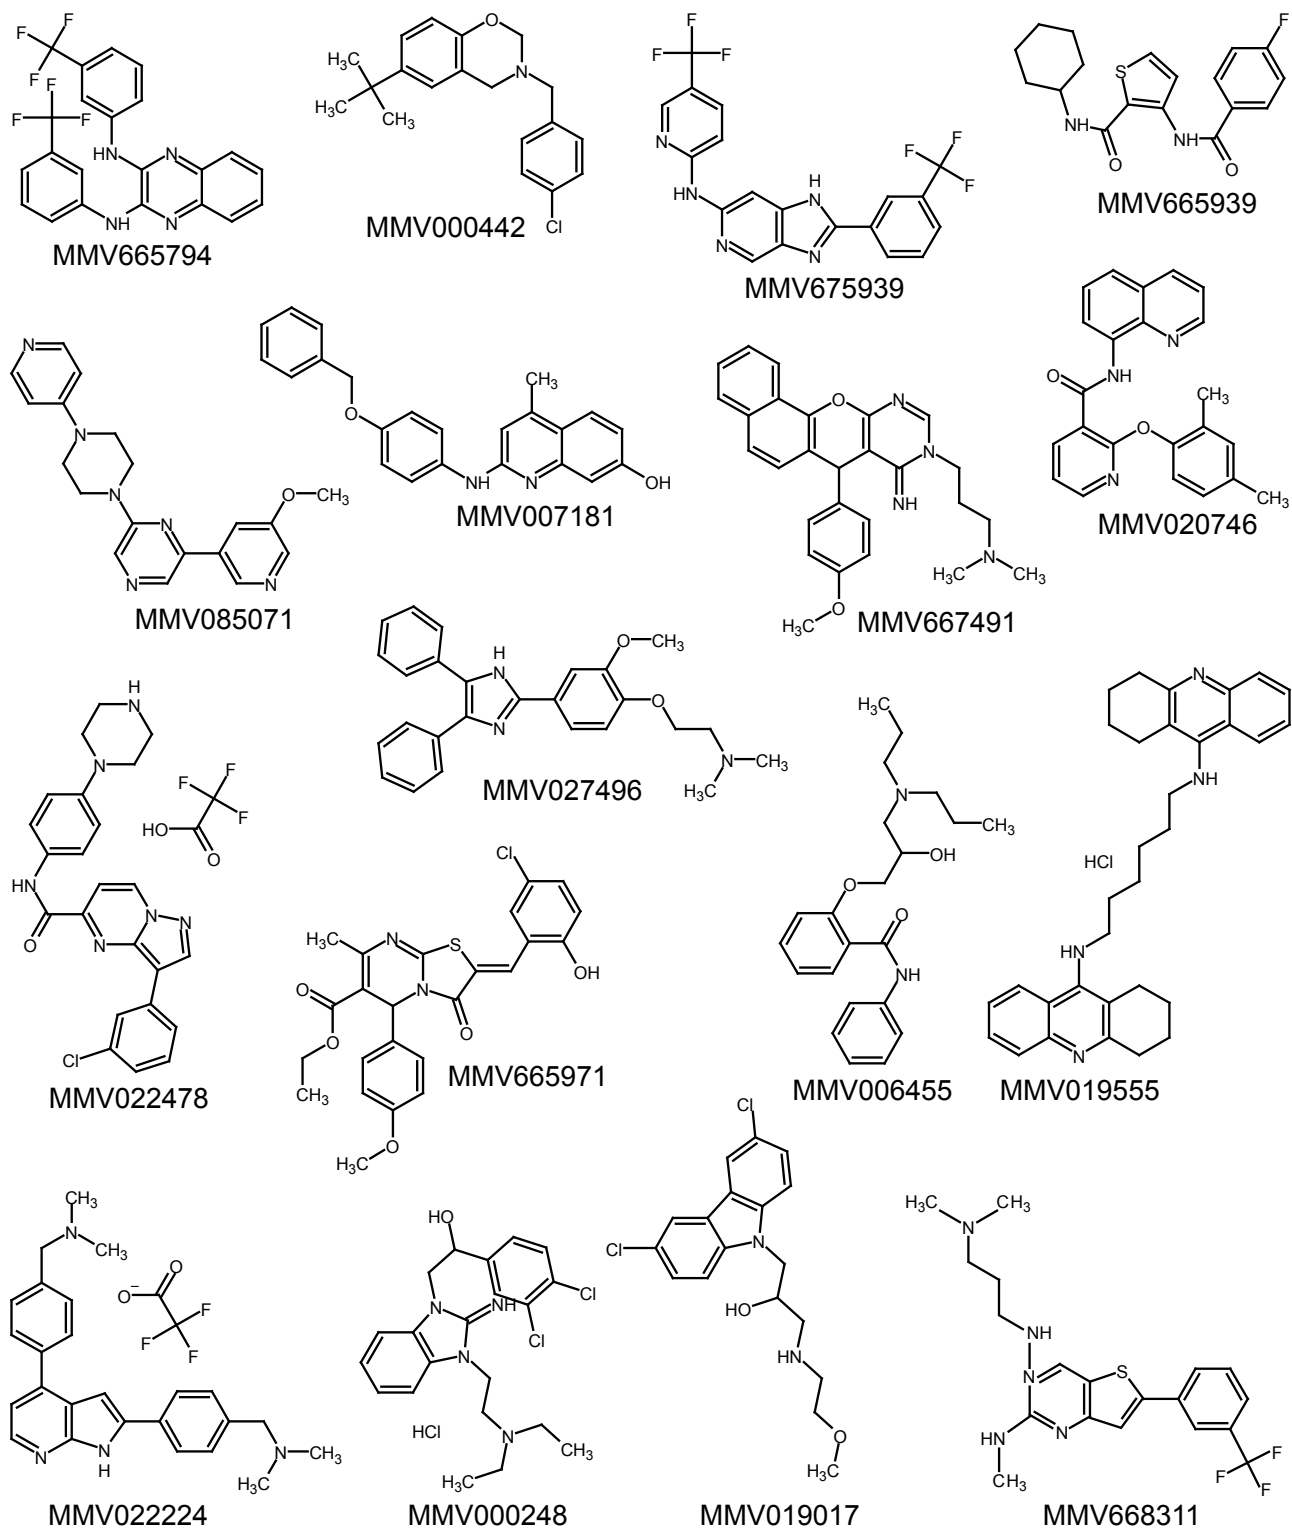

**Figure S2 (related to Figures 1–6). Structures of the tested antimalarials, part 2.** References on mode of action can be found in Table S2.

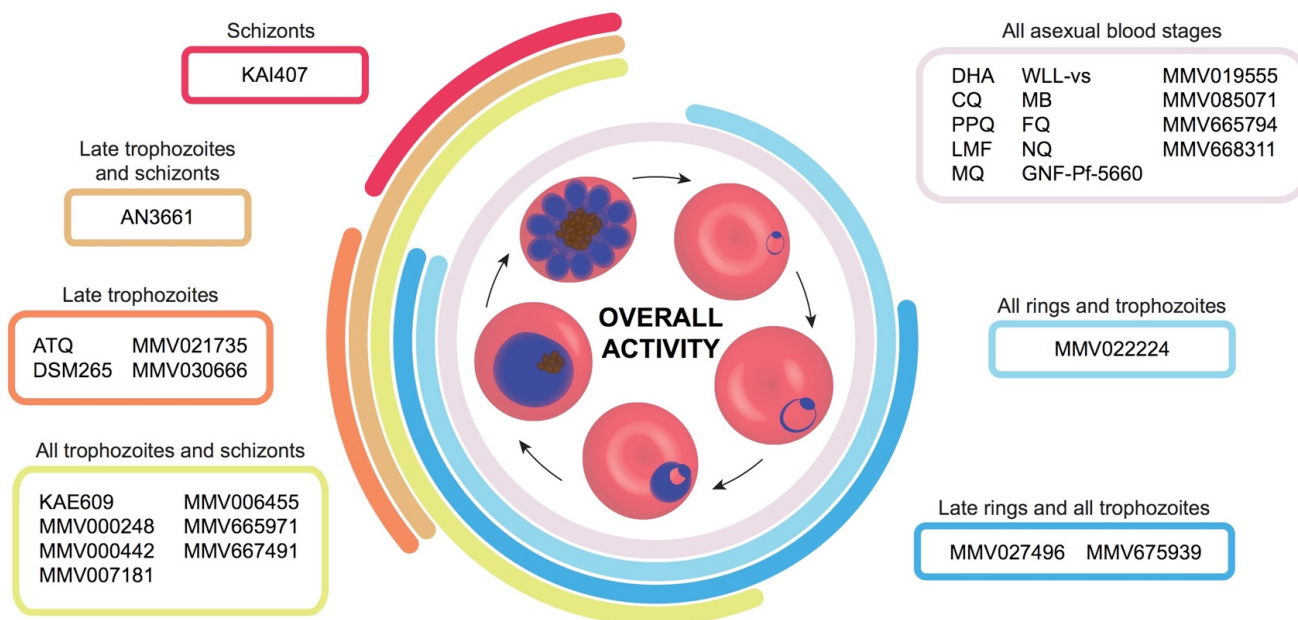

**Figure S3 (related to Figure 6). Overall activity profile of compounds.** Overall activity is defined as the stages with  $IC_{50}^{8h}$  values  $< 1 \mu M$ . Fosmidomycin, MMV000787, MMV019017, MMV020746, MMV022478 and MMV665939 are not depicted, as all stages showed  $IC_{50}^{8hr}$  values  $> 1 \mu M$ . MMV006455, MMV000442, MMV007181 and MMV665971 are omitted from panel A due to incomplete killing at individual stages. DHA: dihydroartemisinin; CQ: chloroquine; PPQ: piperaquine; LMF: lumefantrine; MQ: mefloquine; MB: methylene blue; FQ: ferroquine; NQ: naphthoquine; ATQ: atovaquone.

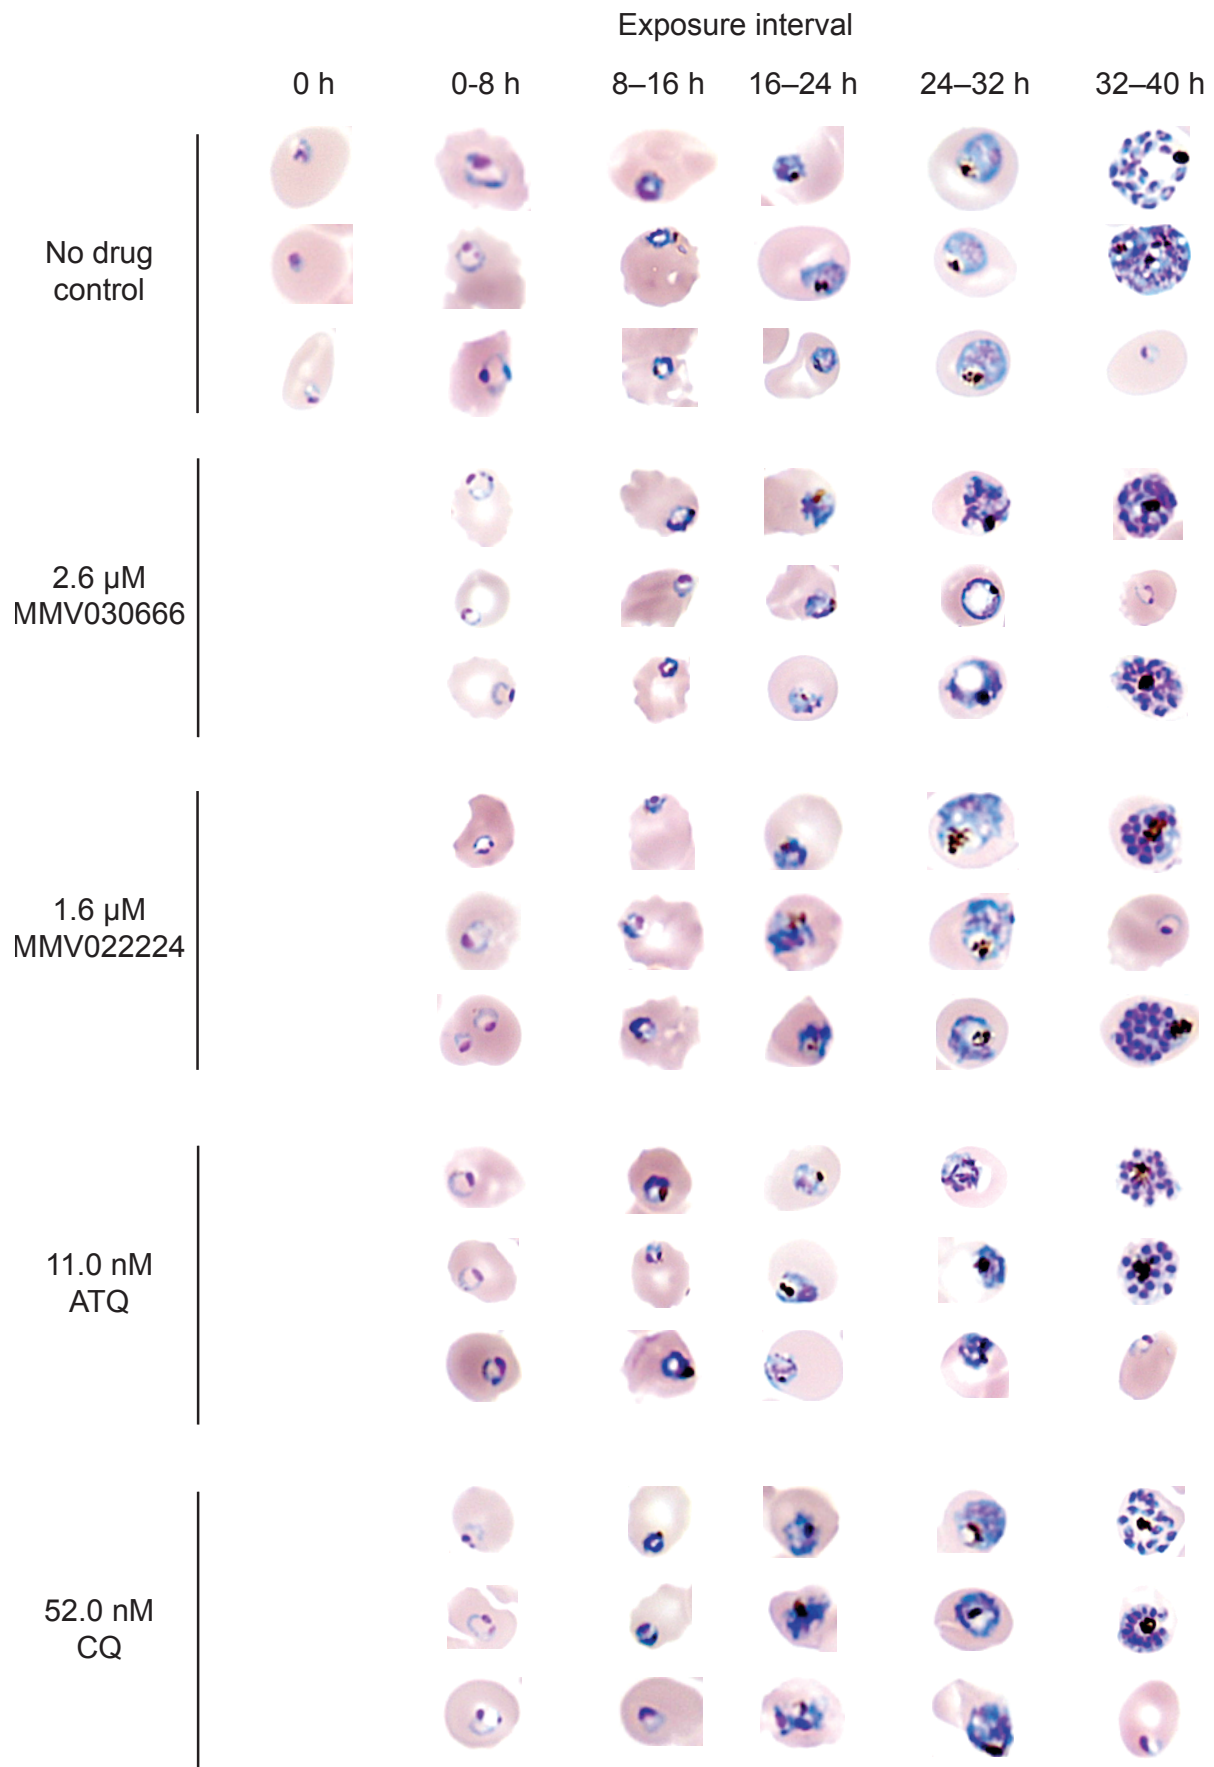

**Figure S4 (related to Figure 2 and Figure 4).** Microscopical studies confirm the stage specificity profiles of MMV030666 and MMV022224, using ATQ and CQ as controls. Synchronized parasites were exposed to  $3\times$  their lowest  $IC_{50}^{8h}$  at the indicated life stages, and were assessed at the end of each exposure. ATQ: atovaquone, CQ: chloroquine.
